# First Issue Online Now! “The Opioid Crisis: Filling in the Picture”

*Psychiatric Research and Clinical Practice:*  
An Open-Access Journal From the  
American Psychiatric Association

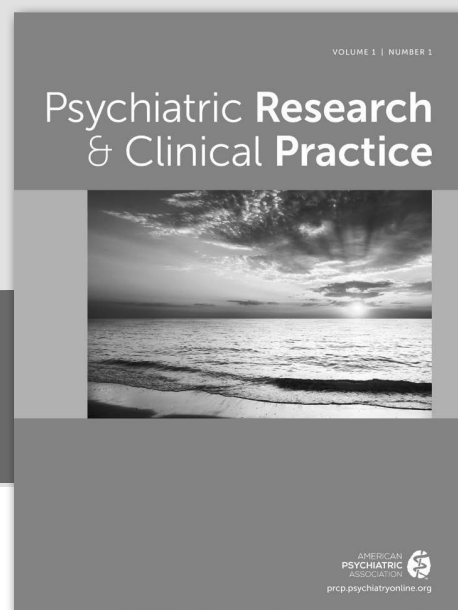

The first issue of *Psychiatric Research and Clinical Practice (PRCP)* focuses on the opioid crisis, covering pharmacological and behavioral treatments of opioid use disorder, general medical and psychiatric comorbidities, and less frequently addressed topics—such as opioid use in Latin America and treatment engagement of pregnant women with opioid use disorder.

*PRCP* is a peer-reviewed, open-access journal from the American Psychiatric Association that offers a high-profile publishing destination for peer-reviewed submissions that build on the psychiatric knowledge base and bring research findings closer to clinical utility through deeper investigation.

Be a part of the conversation. Submissions are welcome on all aspects of mental and behavioral health to inform the field from bench to bedside. *PRCP* articles occupy that place between research and clinical utility, leaning toward clinical utility through publication of replication studies and features that show how new scientific knowledge can inform clinical practice.

*Psychiatric Research and Clinical Practice* is committed to keeping the field of psychiatry vibrant and relevant by publishing wide-ranging information on all aspects of mental and behavioral health. Published in accordance with open-access principles, *PRCP* makes all of its content immediately available for free—the reach one wants from an established and respected publisher.

## About the Editor

**Kimberly A. Yonkers, M.D.**, is Professor of Psychiatry, Epidemiology, Obstetrics/Gynecology, and Reproductive Sciences and Director of the Center for Wellbeing of Women and Mothers at Yale University. She brings to the task of serving as *PRCP*'s Editor a broad and deep experience in research and clinical work. Her research includes investigations into the clinical course, etiopathology, and treatment of psychiatric disorders as they occur in women. A major component of this work includes investigations into the occurrence and treatment of illnesses in pregnancy and the postpartum period and across the menstrual cycle. This area, by its nature, cuts across disciplines and requires psychiatric expertise as well as knowledge in neuroscience and reproductive biology. Her work has also included determining optimal methods for screening and treating women for substance use problems when they are pregnant or postpartum.

AMERICAN  
PSYCHIATRIC  
ASSOCIATION  
PUBLISHING

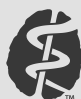

www.appi.org  
1-800-368-5777  
appi@psych.org

[prcp.psychiatryonline.org](http://prcp.psychiatryonline.org)

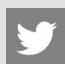

@APAPubPRCP

AH1915

# APA Membership for every step of your career

## Join us today

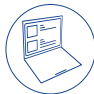

**World-Class Learning**

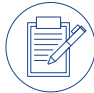

**Practice Resources**

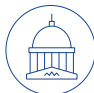

**Advocacy for Mental Health**

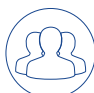

**A Professional Community**

[psychiatry.org/JoinAPA](http://psychiatry.org/JoinAPA)

Former member? You're likely eligible for dues amnesty. Contact us at [membership@psych.org](mailto:membership@psych.org) or 1-888-357-7924 for more information.

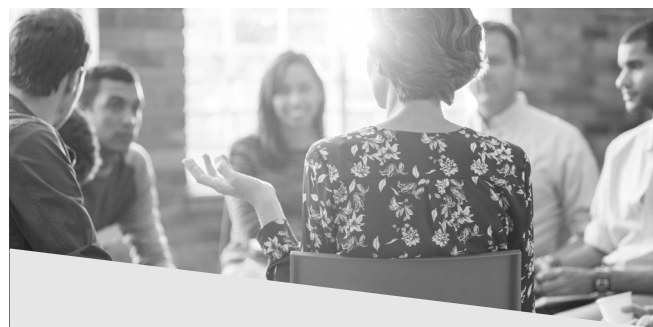

## Expand Your Opportunities And Grow Your Career

Join the largest, most dynamic mental health department in the nation and make a difference in the lives of those who need it the most.

- Multiple avenues for advancement and professional development
- Flexible work schedules, unparalleled work-life balance
- Highly competitive benefits
- Competitive starting annual salary with potential bonuses of up to **\$32,000 annually**
- Student loan repayment incentive of up to **\$250,000**
- Reimbursement for eligible relocation expense of up to **\$15,000**

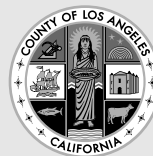

LOS ANGELES COUNTY  
DEPARTMENT  
OF MENTAL HEALTH

HOPE • RECOVERY • WELLBEING

[www.psychiatristjobs.la](http://www.psychiatristjobs.la)

Visit [ps.psychiatryonline.org](http://ps.psychiatryonline.org) for these features!

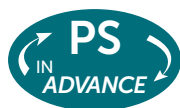

*Discover the latest research before it appears in print*

**Psychiatric Emergency Department Visits After Regional Expansion of Community Health Centers**

**Bed Tracking Systems: Do They Help Address Challenges in Finding Available Inpatient Beds?**

**Use of an Educational Video to Reduce Barriers to Military Mental Health Care**

**PSYCHIATRIC  
SERVICES**

FROM PAGES  
TO PRACTICE

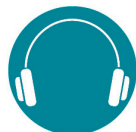

Episode 24: **First-Episode Psychosis, Marijuana Legalization, and Suicide**

### Editor's Choice

New collection available:

**Mental Health Disparities Among Racial and Ethnic Minority Groups**

Receive monthly: [appi.org/etocs](http://appi.org/etocs)

View collections: [ps.psychiatryonline.org/editorschoice](http://ps.psychiatryonline.org/editorschoice)

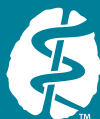



*Ariella, an artist, musician, and real person living with schizophrenia*

SCHIZOPHRENIA  
DIAGNOSIS

EXPERIENCED  
SIDE EFFECTS

STARTED  
COLLEGE

STARTED  
MEDICATION

STOPPED  
MEDICATION

G  
R  
A  
D  
U  
A  
T  
I  
O  
N

# Schizophrenia shouldn't derail her life

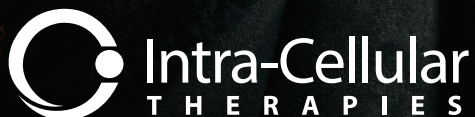

BUILT ON NOBEL PRIZE-WINNING SCIENCE

Visit [SZJourney.com](http://SZJourney.com) to learn more
