# Psychiatric Services

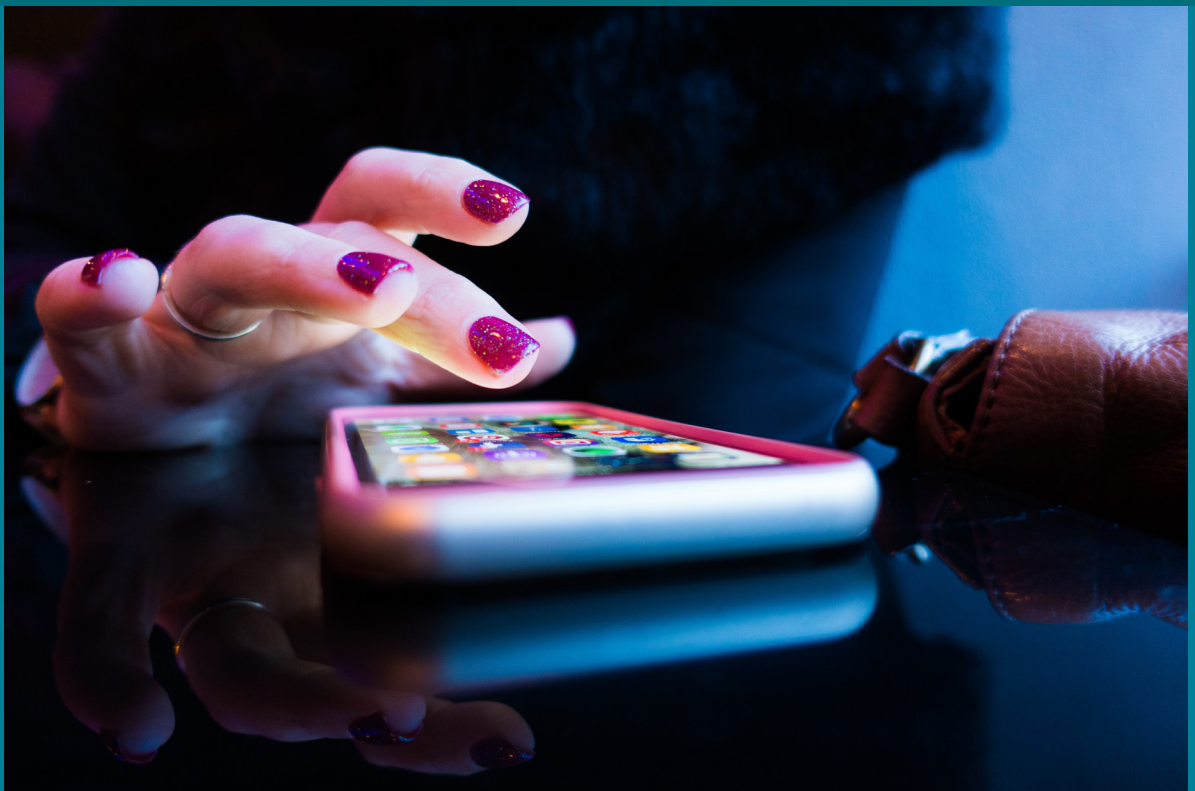

Suicide prevention with calls to recently hospitalized adolescents  
Understanding low uptake of promising mobile mental health apps  
Marijuana legalization: considerations for state policy makers  
Increasing opioid agonist therapy via ACA Medicaid expansion
