# The American Psychiatric Association Publishing Textbook of Psychiatry, Seventh Edition

*Edited by Laura Weiss Roberts, M.D., M.A.*

*Foreword by David J. Kupfer, M.D.*

**T**he American Psychiatric Association Publishing Textbook of Psychiatry, first published more than 30 years ago, is a landmark text with a legacy of sound scholarship, expert knowledge, and effective pedagogy. Thoroughly revised and featuring new authors and content, the seventh edition raises the bar, adding age-related, cultural, societal, and population considerations in the practice of psychiatry to the authoritative text that generations of students, residents, and clinicians have heretofore relied upon.

The book first focuses on foundational knowledge, with chapters on psychiatric interviewing, diagnostic formulation, developmental assessment, laboratory testing and neuroimaging, and ethical and legal aspects of clinical psychiatry, and then proceeds to a full presentation of psychiatric disorders in alignment with DSM-5. The third section offers an overview of treatment strategies and methods in present-day psychiatry, a combination of evidence-based biological interventions and psychotherapies, and gives a clear sense of exciting new directions in psychiatric therapeutics. The final section of the textbook is focused on the care of special patient populations, including women; children and adolescents; lesbian, gay, bisexual, and transgender individuals; older adults; and culturally diverse individuals.

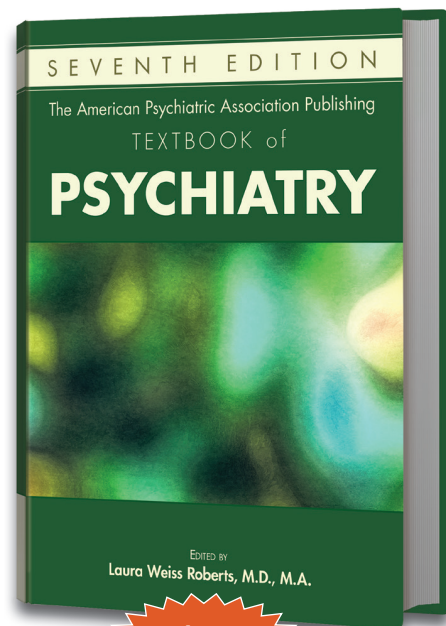

**Just  
Published!**

---

2019 • 1,362 pages • ISBN 978-1-61537-150-1 • Hardcover • \$275.00 • Item #37150

2019 • 1,362 pages • ISBN 978-1-61537-256-0 • eBook • \$220.00 • Item #37256

---

AMERICAN  
PSYCHIATRIC  
ASSOCIATION  
PUBLISHING

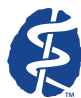

Order online @ [appi.org](http://appi.org)

or Call Toll Free: 1-800-368-5777

Email: [appi@psych.org](mailto:appi@psych.org)

**20% Discount for American Psychiatric Association Members**

**25% Discount for APA Resident-Fellow Members**

Priority Code AH1911A

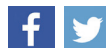

Source: https://ps.psychiatryonline.org/doi/suppl/10.1176/ps.2019.70.issue-7/suppl_file/front.pdf
